# Supplementary material for: Acetylcysteine-functionalized microporous conjugated polymers for potential separation of uranium from radioactive effluents
Source: Royal Society of Chemistry journal article supplement (doi:10.1039/c6ta10824e), 2017-01-01
Supplement: c6ta10824e1.pdf [file c6ta10824e1.pdf]

Supporting Information

## Acetylcysteine-Functionalized Microporous Conjugated Polymers for Potential Separation of Uranium from Radioactive Effluents

Xiaoli Han, Meiyun Xu, Sen Yang, Jun Qian, Daoben Hua

<sup>a</sup> School for Radiological and Interdisciplinary Sciences (RAD-X) & College of Chemistry, Chemical Engineering and Materials Science, Soochow University, Suzhou 215123, China

<sup>b</sup> Collaborative Innovation Center of Radiological Medicine of Jiangsu Higher Education Institutions, Suzhou 215123, China

### Table of contents

|                                   |     |
|-----------------------------------|-----|
| Characterization methods.....     | S2  |
| Sorption kinetics.....            | S2  |
| Sorption isotherms.....           | S3  |
| Distribution ratio ( $K_d$ )..... | S3  |
| Table S1.....                     | S4  |
| Table S2.....                     | S5  |
| Table S3.....                     | S5  |
| Table S4.....                     | S6  |
| Table S5.....                     | S6  |
| Fig. S1.....                      | S7  |
| Fig. S2.....                      | S7  |
| Fig. S3.....                      | S8  |
| Fig. S4.....                      | S8  |
| Fig. S5.....                      | S9  |
| Fig. S6.....                      | S9  |
| Fig. S7.....                      | S10 |
| Fig. S8.....                      | S10 |
| Fig. S9.....                      | S11 |
| References.....                   | S11 |

## 1. Characterization methods

Infrared absorption spectra were acquired by a Varian-1000 Fourier transform infrared (FT-IR) spectrometer. Solid-state  $^{13}\text{C}$  CP/MAS NMR measurements were carried out on a Bruker Avance III model 400 MHz NMR spectrometer at a MAS rate of 5 kHz. Elemental analysis (EA) was determined by ELEMENTAR CHNOS Elemental Analyzer. The uranyl ions concentration was determined by thermo high resolution inductively coupled plasma mass spectrometer (ICP-MS, Element II). Surface areas and pore size distributions were measured by nitrogen sorption and desorption at 77.3 K using the ASAP 2020 volumetric sorption analyzer. BET surface areas were calculated over the relative pressure range 0.05-0.15  $P/P_0$ . Samples were degassed at 100 °C for 10 h under high vacuum before analysis.  $^{60}\text{Co}$  gamma-ray irradiation was carried out at  $^{60}\text{Co}$  radiation laboratory of Soochow University. The dose rate was 15 Gy/min. Malvern Zeta sizer (632.8 nm, He-Ne laser) was used to record the zeta potential and Z-average size distribution of the corresponding materials.

## 2. Sorption kinetics

Pseudo-first-order equation is described as followed (1):

$$\log(q_e - q_t) = \log q_e - \left(\frac{k_1}{2.303}\right) \times t \quad (1)$$

where  $q_e$  and  $q_t$  (mg/g) are the sorption capacity of U(VI) at equilibrium time and contact time  $t$  (min), respectively, and  $k_1$  ( $\text{min}^{-1}$ ) represents the pseudo first order kinetic constant.  $q_e$  and  $k_1$  can be calculated from the slope and intercept of the plot of  $\log(q_e - q_t)$  versus  $t$ , respectively (Fig. S7A).

Pseudo-second-order model is expressed as the following Equation (2):

$$\frac{t}{q_t} = \frac{1}{k_2 \times q_e^2} + \frac{t}{q_e} \quad (2)$$

where  $k_2$  (g/mg/min) represents the rate constant of the pseudo-second order model, and can be determined from the plot of  $t/q_t$  against  $t$  (Fig. S7B).

## 3. Sorption isotherms

Langmuir model can be described as Equation (3):

$$\frac{C_e}{q_e} = \frac{1}{q_{\max} b} + \frac{C_e}{q_{\max}} \quad (3)$$

where  $b$  (L/mg) is the Langmuir constant related to the affinity of binding sites, and  $q_{\max}$  (mg/g) is the maximum sorption capacity. They can be calculated from the linear plot of  $C_e/q_e$  against  $C_e$  (Fig. S8A and S9A).

The Freundlich model<sup>1</sup> is applied for multilayer sorption, which can be described as Equation (4):

$$\log q_e = \log K_F + \frac{1}{n} \log C_e \quad (4)$$

where  $K_F$  [mg/g (L/mg)<sup>1/n</sup>] and  $n$  are the Freundlich constants related to sorption capacity and sorption intensity, respectively, which can be calculated from the linear plot of  $\log q_e$  versus  $\log C_e$  (Fig. S8B and S9B).

#### 4. Distribution ratio ( $K_d$ )

The distribution ratio ( $K_d$ ) is calculated according to Equation (5):

$$K_d = \frac{C_0 - C_e}{C_e} \times \frac{V}{M} \quad (5)$$

where  $C_0$  and  $C_e$  (mg/L) are the initial and equilibrium concentration of uranyl ions, respectively.  $M$  (g) is the weight of sorbent, and  $V$  (L) is the volume of the testing solution.

Table S1. Comparison of sorption rate and sorption capacity of U(VI) on various uranium sorbents.

| Sorbents                                             | Experimental conditions | Sorption equilibration time | Sorption capacity (mg/g) | References |
|------------------------------------------------------|-------------------------|-----------------------------|--------------------------|------------|
| Fe <sub>3</sub> O <sub>4</sub> @SiO <sub>2</sub> -AO | pH 5.0, T 298 K         | 4h                          | 104                      | 1          |
| Amino functional MOFs                                | pH 5.5, T 298 K         | 50min                       | 350                      | 2          |
| Poly(acrylic acid)-functionalized microspheres       | pH 4.5, T 298 K         | 2.5h                        | 990                      | 3          |
| GO-ACF                                               | pH 5.5, T 298 K         | 1h                          | 394                      | 4          |
| SBA-15                                               | pH 4.0, T 298 K         | 3h                          | 65                       | 5          |
| Mesoporous carbon                                    | pH 4.0, T 298 K         | 5min                        | 67                       | 6          |
| MA-TMA                                               | pH 4.5, T 298 K         | 10min                       | 324                      | 7          |
| Benzimidazole-functionalized 2D COF                  | pH 4.5, T 298 K         | 30min                       | 211                      | 8          |
| MCP-3                                                | pH 5.5, T 298 K         | 40s                         | 165                      | This work  |

Table S2. Kinetic parameters for the sorption of U(VI) by MCP-1,2,3,4. (Experimental condition: 1 mg of sorbent dose, 5 mL of solution,  $1 \times 10^{-5}$  mol/L U(VI), pH  $5.5 \pm 0.1$ , and 298.15 K.)

| Material | Pseudo-first order |        |             |       | Pseudo-second order |             |       |
|----------|--------------------|--------|-------------|-------|---------------------|-------------|-------|
|          | $q_{e,exp}$        | $k_1$  | $q_{e,cal}$ | $R^2$ | $k_2$               | $q_{e,cal}$ | $R^2$ |
|          | (mg/g)             | (/min) | (mg/g)      |       | (g/mg/min)          | (mg/g)      |       |
| MCP-1    | 5.616              | 0.187  | 0.579       | 0.789 | 0.352               | 5.624       | 0.999 |
| MCP-2    | 5.895              | 0.082  | 0.495       | 0.421 | 1.983               | 5.885       | 0.999 |
| MCP-3    | 6.473              | 0.061  | 0.173       | 0.148 | 6.759               | 6.468       | 0.999 |
| MCP-4    | 7.051              | 0.512  | 1.014       | 0.786 | 2.880               | 7.063       | 0.999 |

Table S3. Langmuir and Freundlich parameters for U(VI) sorption by the MCPs. (Experimental conditions: 1 mg of sorbent dose, 5 ml of solution,  $4.2 \times 10^{-5}$  mol/L  $\sim$   $4.2 \times 10^{-4}$  mol/L U(VI), pH  $5.5 \pm 0.1$ , and 298.15 K, contact time = 20 min)

| Material | Langmuir  |        |       | Freundlich  |       |       |
|----------|-----------|--------|-------|-------------|-------|-------|
|          | $q_{max}$ | $b$    | $R^2$ | $K_F$ (L/g) | $n$   | $R^2$ |
|          | (mg/g)    | (L/mg) |       |             |       |       |
| MCP-1    | 64.26     | 0.0687 | 0.994 | 2.83        | 2.025 | 0.973 |
| MCP-2    | 112.17    | 0.0834 | 0.994 | 4.62        | 2.565 | 0.982 |
| MCP-3    | 165.25    | 0.6673 | 0.998 | 8.71        | 5.089 | 0.976 |
| MCP-4    | 70.11     | 0.3978 | 0.995 | 5.54        | 4.948 | 0.931 |

Table S4. Langmuir and Freundlich parameters for U(VI) sorption by the MCPs. (Experimental conditions: 1 mg of sorbent dose, 5 ml of solution,  $4.2 \times 10^{-6}$  mol/L  $\sim$   $4.2 \times 10^{-5}$  mol/L U(VI), pH  $5.5 \pm 0.1$ , and 298.15 K, contact time = 20 min.)

| Material | Langmuir          |            |       | Freundlich  |       |       |
|----------|-------------------|------------|-------|-------------|-------|-------|
|          | $q_{\max}$ (mg/g) | $b$ (L/mg) | $R^2$ | $K_F$ (L/g) | $n$   | $R^2$ |
| MCP-1    | 17.67             | 2.8931     | 0.962 | 3.42        | 2.787 | 0.991 |
| MCP-2    | 28.94             | 4.9076     | 0.966 | 4.95        | 2.246 | 0.992 |
| MCP-3    | 23.59             | 51.060     | 0.892 | 5.23        | 3.656 | 0.992 |
| MCP-4    | 23.94             | 33.677     | 0.919 | 5.10        | 3.658 | 0.990 |

Table S5. Comparison of the diameter of coexisting ions in the solution.\*

| Species   | $(\text{UO}_2)_3(\text{OH})_5^+$ | $(\text{UO}_2)_4(\text{OH})_7^+$ | $\text{OH}^-$ | $\text{NO}_3^-$ | $\text{Cr}^{3+}$ | $\text{Co}^{2+}$ | $\text{Ni}^{2+}$ | $\text{Cd}^{2+}$ | $\text{Nd}^{3+}$ | $\text{Zn}^{2+}$ |
|-----------|----------------------------------|----------------------------------|---------------|-----------------|------------------|------------------|------------------|------------------|------------------|------------------|
| Size (nm) | 1.2                              | 1.5                              | 0.1<br>1      | 0.33            | 0.14             | 0.15             | 0.13             | 0.19             | 0.19             | 0.15             |

\*: The data for metal ions was from Periodic Table of Chemical Elements. Anions and uranyl complexes were simulated by Chem 3D software and CrystalMaker Demo (Fig. S6<sup>†</sup>), respectively.

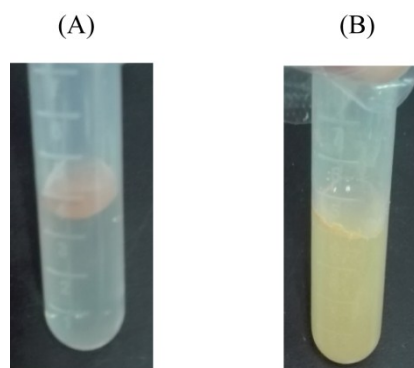

Fig. S1 Dispersibility of MCP-0 (A) and MCP-1 (B) in water.

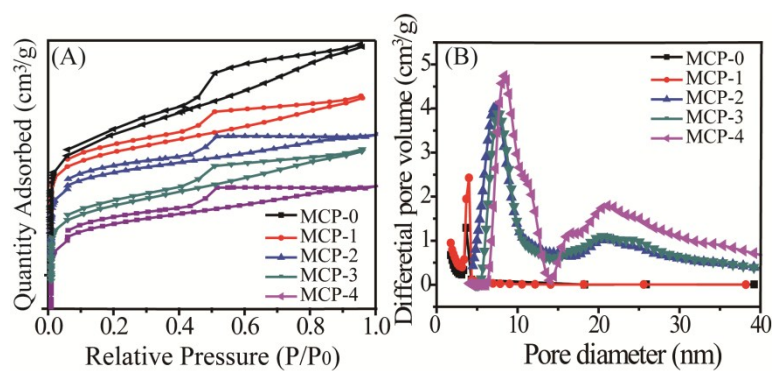

Fig. S2 (A) Nitrogen sorption (the bottom line) /desorption (the above line) isotherms and (B) pore size distribution for MCP-0, 1, 2, 3, 4.

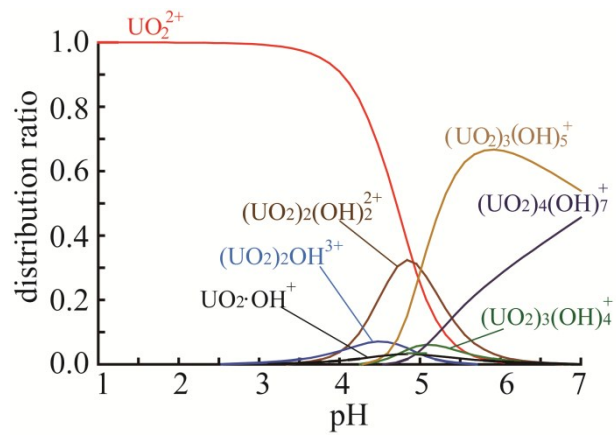

Fig. S3 Distribution of U(VI) species in aqueous solution ( $[\text{U}] = 0.67\text{mmol/L}$  and pH values ranging from 1 to 7), which was simulated by Medusa program.

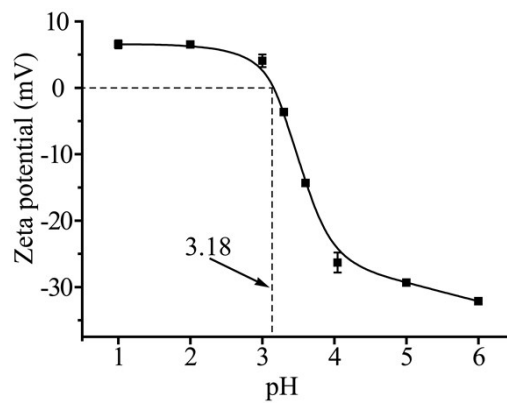

Fig. S4 Zeta potential of MCP-1.



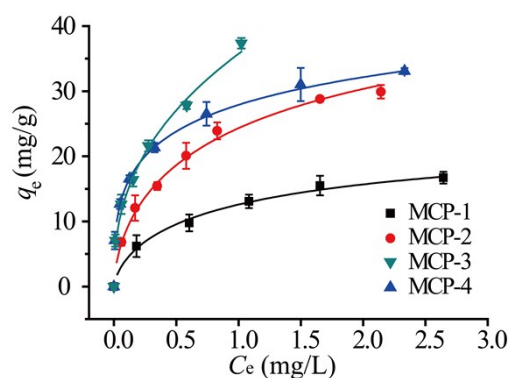

Fig. S5 Sorption isotherms of U(VI) on MCPs. (Experimental condition: 1 mg of sorbent dose, 5 mL of solution,  $4.2 \times 10^{-6}$  mol/L  $\sim 4.2 \times 10^{-5}$  mol/L U(VI), pH  $5.5 \pm 0.1$ , and 298.15 K.)

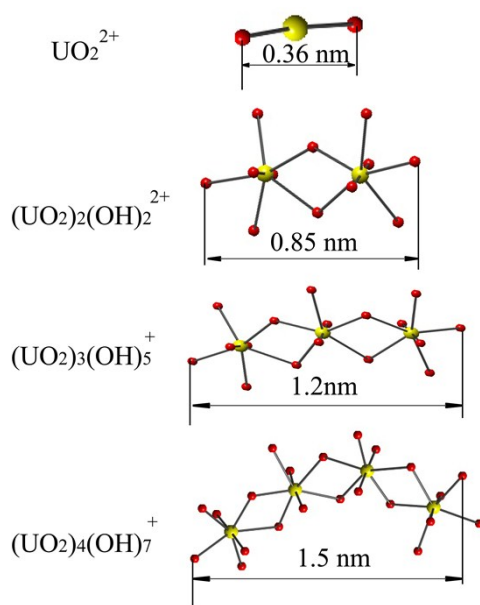

Fig. S6 The diameter of the uranium species by CrystalMaker Demo.

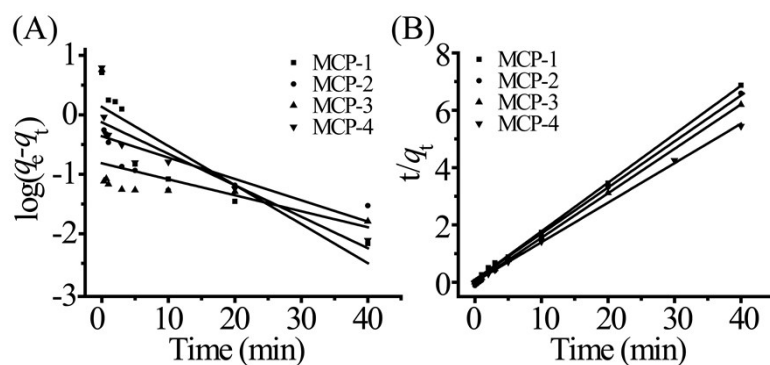

Fig. S7 (A) Pseudo-first order kinetics and (B) pseudo-second order kinetics for the sorption of U(VI) onto the MCPs.

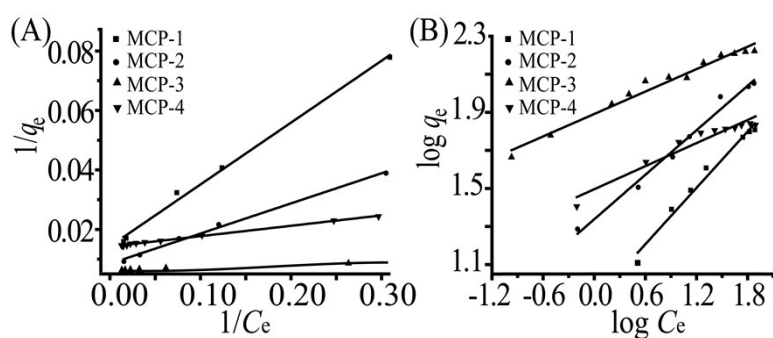

Fig. S8 (A) Langmuir sorption isotherm plots and (B) Freundlich sorption isotherm plots for the sorption of U(VI) onto the MCPs.

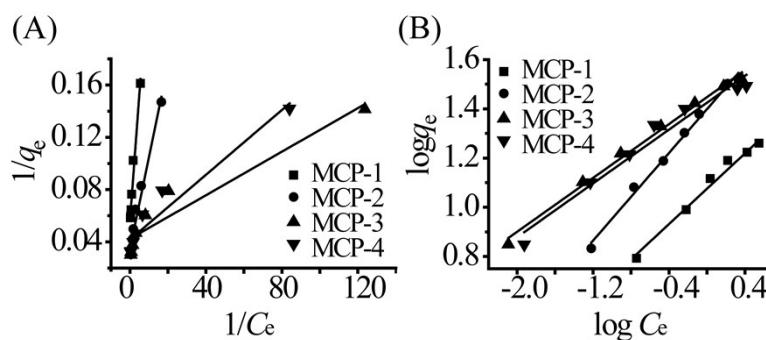

Fig. S9 (A) Langmuir sorption isotherm plots and (B) Freundlich sorption isotherm plots for the sorption of U(VI) onto the MCPs. (Experimental condition: 1 mg of sorbent dose, 5 mL of solution,  $4.2 \times 10^{-6}$  mol/L  $\sim$   $4.2 \times 10^{-5}$  mol/L U(VI), pH  $5.5 \pm 0.1$ , and 298.15 K.)

## References

1. Y. G. Zhao, J. X. Li, L. P. Zhao, S. W. Zhang, Y. S. Huang, X. L. Wu and X. K. Wang, *Chemical Engineering Journal*, 2014, **235**, 275-283.
2. Z. Q. Bai, L. Y. Yuan, L. Zhu, Z. R. Liu, S. Q. Chu, L. R. Zheng, J. Zhang, Z. F. Chai and W. Q. Shi, *Journal of Materials Chemistry A*, 2015, **3**, 525-534.
3. S. Zhang, X. W. Shu, Y. Zhou, L. Huang and D. B. Hua, *Chemical Engineering Journal*, 2014, **253**, 55-62.
4. Y. Wang, Z. S. Wang, Z. X. Gu, J. J. Yang, J. L. Liao, Y. Y. Yang, N. Liu and J. Tang, *Journal of Radioanalytical and Nuclear Chemistry*, 2015, **304**, 1329-1337.
5. Y. L. Wang, L. J. Song, L. Zhu, B. L. Guo, S. W. Chen and W. S. Wu, *Dalton Transactions*, 2014, **43**, 3739-3749.
6. M. Carboni, C. W. Abney, K. M. L. Taylor-Pashow, J. L. Vivero-Escoto and W. B. Lin, *Industrial & Engineering Chemistry Research*, 2013, **52**, 15187-15197.
7. B. Li, C. Y. Bai, S. Zhang, X. S. Zhao, Y. Li, L. Wang, K. Ding, X. Shu, S. J. Li and L. J. Ma, *Journal of Materials Chemistry A*, 2015, **3**, 23788-23798.
8. J. Li, X. D. Yang, C. Y. Bai, Y. Tian, B. Li, S. Zhang, X. Y. Yang, S. D. Ding, C. Q. Xia, X. Y. Tan, L. J. Ma and S. J. Li, *Journal of Colloid and Interface Science*, 2015, **437**, 211-218.
